# Supplementary material
Source: publisher site journal article supplement (https://www.dovepress.com/article/407552)
Supplement: Supplementary file 1 [file get_supplementary_file.php]

**Appendix 1. Keywords and search terms**

| **Patient** | **Asthma** | **Health care** | **Qualitative** |
| --- | --- | --- | --- |
| patients OR  health care provider OR  healthcare professional OR  nurse OR  medical staff OR  pharmacists OR  physicians OR  doctor OR  GP OP  General probationer OR  respiratory therapist | asthma  asthmatic | medication adherence OR  medication compliance OR  medication concordance OR  medication persistence OR  medicine management OR  drug therapy OR  treatment adherence OR  treatment compliance OR  treatment concordance OR  treatment persistence | qualitative research or  qualitative OR  interview OR  focus group OR phenomenology OR grounded theory OR ethnography* OR  content analysis OR thematic analysis OR  phenomenological analysis |

*Wildcard is used to search for alternate word endings and retrieve more complex variations.

**Appendix 2. Searched databases**

**Search conducted in PubMed on 07/27/2022**

| **Query Or #** | **Search term** | **Records retrieved or results** |
| --- | --- | --- |
| 1 | "Patients"[Mesh] | 76320 |
| 2 | "Nurses"[Mesh] | 95724 |
| 3 | "Medical Staff"[Mesh] | 28576 |
| 4 | "Pharmacists"[Mesh] | 20417 |
| 5 | "Physicians"[Mesh] | 167466 |
| 6 | (((("Patients"[Mesh]) OR ("Nurses"[Mesh])) OR ("Medical Staff"[Mesh])) OR ("Pharmacists"[Mesh])) OR ("Physicians"[Mesh]) | 368582 |
| 7 | ((((((((((patients[Title/Abstract]) OR (health care provider[Title/Abstract])) OR (healthcare professional[Title/Abstract])) OR (nurse[Title/Abstract])) OR (medical staff[Title/Abstract])) OR (pharmacists[Title/Abstract])) OR (physicians[Title/Abstract])) OR (doctor[Title/Abstract])) OR (GP[Title/Abstract])) OR (General probationer[Title/Abstract])) OR (respiratory therapist[Title/Abstract]) | 690582 |
| 8 | 6or7 | 7092612 |
| 9 | "Asthma"[Mesh] | 138240 |
| 10 | asthmatic[Title/Abstract] | 32256 |
| 11 | 9or10 | 143826 |
| 12 | "Drug Therapy"[Mesh] | 1469311 |
| 13 | ((((((((medication adherence [Title/Abstract]) OR (medication compliance [Title/Abstract])) OR (medication concordance [Title/Abstract])) OR (medication persistence[Title/Abstract])) OR (medicine management[Title/Abstract])) OR (drug therapy[Title/Abstract])treatment adherence) OR (treatment compliance[Title/Abstract])) OR (treatment concordance[Title/Abstract])) OR (treatment persistence[Title/Abstract]) | 17363 |
| 14 | 12or13 | 1483006 |
| 15 | "Qualitative Research"[Mesh] | 75426 |
| 16 | (((((((((qualitative research [Title/Abstract]) OR (qualitative[Title/Abstract])) OR (interview[Title/Abstract])) OR (focus group[Title/Abstract])) OR (phenomenology[Title/Abstract])) OR (grounded theory[Title/Abstract])) OR (ethnography*[Title/Abstract])) OR (content analysis[Title/Abstract])) OR (thematic analysis[Title/Abstract])) OR (phenomenological analysis[Title/Abstract]) | 479743 |
| 17 | 15or16 | 491749 |
| 18 | 8and11ang14and17 | 127 |

**Search conducted in Web of Science on 07/27/2022**

| Query Or # | Search term | Records retrieved or results |
| --- | --- | --- |
| 1 | patients (Theme) or "health care provider" (Theme) or "health professional" (Theme) or nurse (Theme) or "medical staff" (Theme) or pharmacists (Theme) or physicians (Theme) or doctor (Theme) or "General probationer" (Theme) or "respiratory therapist" (Theme) or GP (Theme) | 7715915 |
| 2 | asthma (Theme) or asthmatic (Theme) | 222051 |
| 3 | "medication adherence" (Theme) or "medication compliance" (Theme) or "medication concordance" (Theme) or "medication persistence" (Theme) or "medicine management" (Theme) or "drug therapy" (Theme) or "treatment adherence" (Theme) or "treatment compliance" (Theme) or "treatment concordance" (Theme) or "treatment persistence" (Theme) | 74221 |
| 4 | "qualitative research" (Theme) or qualitative (Theme) or interview (Theme) or "focus group" (Theme) or phenomenology (Theme) or "grounded theory" (Theme) or ethnography* (Theme) or "content analysis" (Theme) or "thematic analysis" (Theme) or "phenomenological analysis" (Theme) | 1221290 |
|  | #1 AND #2 AND #3AND #4 | 180 |

**Search conducted in Scopus on 07/27/2022**

| Query Or # | Search term | Records retrieved or results |
| --- | --- | --- |
| 1 | (TITLE-ABS-KEY patient OR “healthcare provider “OR “health professional” OR nurse OR “medical staff” OR pharmacist OR physician OR doctor OR GP OR “general practitioner OR “respiratory therapist”) | 10,868,217 |
| 2 | (TITLE-ABS-KEY asthma OR asthmatic) | 286,904 |
| 3 | (TITLE-ABS-KEY “medication adherence” OR “medication compliance” OR “medication concordance” OR “medication persistence” OR “medicine management” OR “drug therapy” OR “treatment adherence” OR “treatment compliance” OR “treatment concordance” OR “treatment persistence”) | 2,473,502 |
| 4 | (TITLE-ABS-KEY “qualitative research” OR qualitative OR interview OR “focus group” OR phenomenology OR “content analysis” OR “phenomenological analysis” OR ethnography OR “grounded theory” OR “thematic analysis”) | 2,795,209 |
| 5 | 1 and 2 and 3 and 4 | 1,211 |
| 6 | limit to English Language | 1,131 |
| 7 | limit to article | 906 |
| 8 | limit to final | 903 |
| 9 | (perspective OR experience OR attitude) AND 8 | 569 |

**Search conducted in Embase on 07/27/2022**

| Query Or # | Search term | Records retrieved or results |
| --- | --- | --- |
| 1 | patient or health care provider or health professional or nurse or medical staff or pharmacist or physician or doctor or GP or general probationer or respiratory therapist | 2218582 |
| 2 | asthma or asthmatic | 251406 |
| 3 | medication adherence or medication compliance or medication concordance or medication persistence or medicine management or drug therapy or treatment adherence or treatment compliance or treatment concordance or treatment persistence | 825750 |
| 4 | qualitative research or qualitative or interview or focus group or phenomenology or content analysis or phenomenological analysis or ethnography or grounded theory or thematic analysis | 614530 |
| 5 | 1 and 2 and 3 and 4 | 251 |
| 6 | English language | 251 |

**Search conducted in CINAHL on 07/27/2022**

| Query Or # | Search term | Records retrieved or results |
| --- | --- | --- |
| 1 | (MH "Patients") OR "health care provider" OR "health professional" OR (MH "Nurses") OR (MH "Medical Staff") OR (MH "Pharmacists") OR (MH "Physicians") OR "doctor" OR "GP" OR "general practitioner" OR (MH "Respiratory Therapists") | 260,526 |
| 2 | (MH "Asthma") OR "asthmatic" | 37,886 |
| 3 | "medication adherence" OR (MH "Medication Compliance") OR "medication concordance" OR "medication persistence" OR (MH "Medication Management") OR (MH "Drug Therapy") OR "treatment adherence" OR "treatment compliance" OR "treatment concordance" OR "treatment persistence" | 60,470 |
| 4 | "qualitative research" OR "qualitative" OR (MH "Interviews") OR (MH "Focus Groups") OR (MH "Phenomenology") OR (MH "Content Analysis") OR "phenomenological analysis" OR "ethnography" OR (MH "Grounded Theory") OR (MH "Thematic Analysis") | 365,439 |
| 5 | S1 AND S2 AND S3 AND S4 | 18 |
| 6 | limit to (English language) | 18 |

**Appendix 3. Extraction of findings from included studies**

1. Davis, P., Man, P., Cave, A., McBennett, S., & Cook, D. (2000). Use of focus groups to assess the educational needs of the primary care physician for the management of asthma. Medical education, 34(12), 987-993. <https://onlinelibrary.wiley.com/doi/full/10.1111/j.1365-2923.2000.00685>.x

| **Findings** | **Illustration from study** | **Evidence** |
| --- | --- | --- |
| Lack of consistency in treatment and management between physicians | `there is often a lack of continuity of therapy due to patients seeking advice from different physicians and health care providers'. (Physician) | Unequivocal |
| Concerned about cost and  adverse effects | Patients are concerned about cost and adverse effects and bring these concerns to the physician (Interpreted by the researchers) | Credible |
| Physicians do not have the time to educate patients/ physicians were not providing enough information. | Patients felt that they had insufficient details about what the drugs were expected to do, possible adverse effects, or the flexibility in the proposed treatment regimen. (Interpreted by the researchers) | Credible |
| Communication issue | Patients felt that physicians tended not to listen intently to their concerns or even to their histories and were not always sensitive to the consequences of their advice. (Interpreted by the researchers) | Credible |
| Education needed for patients | `more than 50% of time in dispensing a prescription is taken up by providing patient education which should have been provided by the physician' (Pharmacist) | Unequivocal |

2. Walsh, S., Hagan, T., & Gamsu, D. (2000). Rescuer and rescued: Applying a cognitive analytic perspective to explore the ‘mis‐management’ of asthma. British Journal of Medical Psychology, 73(2), 151-168. <https://bpspsychub.onlinelibrary.wiley.com/doi/abs/10.1348/000711200160390>

| **Findings** | **Illustration from study** | **Evidence** |
| --- | --- | --- |
| Positive relationship with doctor | ‘. . . an I’ve got to be in there (the hospital)’cos I’m scared. Everything’s done for you. He (the doctor) makes it safe.’ (Patient) | Unequivocal |
| Negative relationship with doctor | ‘I’m on me knees, gasping, they take you in. And there you feel safe but on the other hand you get taken over—into pyjamas, told what to do, what to swallow. Nobody tells you anything. You have to obey ’em.’ (Patient) | Unequivocal |
| Negative diagnosis process | ‘. . . nobody wants to know yer poorly . . . Nobody tends to listen.’  ‘I don’t think people are interested in anybody who’s really ill . . . Well people aren’t are they?. . . They’ll say how are you and you’ll say yer know. End of conversation.’(Patient) | Unequivocal |
| Unclear communication | ‘They’re not listening to what yer saying.’ ‘Perhaps a lot of it has been my own fault. Perhaps I’ve not been demanding enough and have accepted what was offered.’ (Patient) | Unequivocal |
| Denial diagnosis | ‘Well I don’t describe it as an illness unless I’m really ill with it.’ ‘I’m more like with me breathing, not like asthma attacks, I don’t tend to have asthma attacks.’ (Patient) | Unequivocal |
| Lost identity | ‘No matter what I just get more tablets, more inhalers. My skins dead papery now through all that. I don’t like looking at myself. I soon as I stop gasping I do my own thing (reduce the drugs).’ (Patient) | Unequivocal |

3. Lindberg, M., Ekström, T., Möller, M., & Ahlner, J. (2001). Asthma care and factors affecting medication compliance: the patient's point of view. International Journal for Quality in Health Care, 13(5), 375-383. https://academic.oup.com/intqhc/article/13/5/375/1823486?login=true

| **Findings** | **Illustration from study** | **Evidence** |
| --- | --- | --- |
| Mistrust of medication | ‘I don’t really believe in the medication, and then I think about side effects. I’m sceptical about all medications, and I’ve heard it can be dangerous to combine asthma medications with other drugs’ (Patient) | Unequivocal |
| Lack of information about disease | ‘I think that in general everybody, relatives, people you work with, need more information, because asthma is increasing in the community.’ (Patient) | Unequivocal |
| Follow up support needed | ‘I’d like to have continual follow-up visits for my asthma to keep my illness under control, and I’d like to be seen by the same staff person who has training in asthma.’ (Patient) | Unequivocal |

4. Scherman, M. H., & Löwhagen, O. (2004). Drug compliance and identity: reasons for non-compliance: experiences of medication from persons with asthma/allergy. Patient Education and Counseling, 54(1), 3-9. <https://www.sciencedirect.com/science/article/pii/S073839910300199X>

| **Findings** | **Illustration from study** | **Evidence** |
| --- | --- | --- |
| Concern about tolerance from medicine | ‘If I had started with those cortisone injections I think I would still be taking them today. Your body gets used to it. You’re treating it too well. Instead of making it work off an attack by itself.’ (Patient) | Unequivocal |
| Positive attitude toward medicine | ‘I always have them (the drugs) in my bag but I hardly ever use them, but it’s really nice to have them in my bag.’ (Patient) | Unequivocal |
| Self-stigma / lost identity | ‘You’re not really yourself when you’re on medication.’ (Patient) | Unequivocal |

5. Gamble, J., Fitzsimons, D., Lynes, D., & Heaney, L. G. (2007). Difficult asthma: people's perspectives on taking corticosteroid therapy. Journal of clinical nursing, 16(3a), 59-67. <https://onlinelibrary.wiley.com/doi/full/10.1111/j.1365-2702.2006.01750.x>

| **Finding** | **Illustration from study** | **Evidence** |
| --- | --- | --- |
| Fear of side effects | ‘Steroids for me are all about your bones, that’s the thing for me, I sort of think it’s to do with your bone density and certainly your more prone to the likes of osteoporosis.’ (Patient) | Unequivocal |
| Lack of information | ‘I’d like to know exactly what they do to you - and they don’t tell you that! It took me a few years to realise you should always request information, you’re never told these things, you have to find out for yourself.’ (Patient) | Unequivocal |
| Busy life | ‘The nebuliser takes up quite a lot of time in the mornings when you are getting ready with the kids and things like that for school.’ (Patient) | Unequivocal |
| Lose identity | ‘Even the children know now when I’m on them, they say ‘Mummy’s back on her drugs’. I am really bad tempered and wicked…I just go upstairs and sit in a room to get away from them all rather than say things that I’d regret…’ (Patient) | Unequivocal |

6. Peláez, S., Bacon, S. L., Aulls, M. W., Lacoste, G., & Lavoie, K. L. (2014). Similarities and differences between asthma health care professional and patient views regarding medication adherence. Canadian Respiratory Journal, 21(4), 221-226. <https://www.hindawi.com/journals/crj/2014/738654/>

| **Finding** | **Illustration from study** | **Evidence** |
| --- | --- | --- |
| Patients’ responsibility | ‘We don’t have to assume that the drug is going to do all the work. The medication contributes, that’s true, but the human being is responsible as well and that entails respecting all the other recommendations suggested by physicians.’ (Patient) | Unequivocal |
| Concern about tolerance from medicine | ‘[Patients] perceive the medication depending on their beliefs. For example, they think that if they take the medication when they have no symptoms, they will get used to it, so when they really need it, it won’t work. Like the narcotics, you know?’ (Physician) | Unequivocal |
| Barriers to medication adherence/patent are busy | It’s one extra thing you add to your already busy daily routine.’(Patient) | Unequivocal |
| Barriers to medication adherence/waiting | ‘Not having a physician who prescribes the medication (or) having to wait for a long time at the drug store.’ (Allied health professionals) | Unequivocal |
| Cost of medicine | ‘My physician told me to take my medication in the mornings and in the evenings, but I take it every two days because that’s a lot of money!’ (Patient) | Unequivocal |
| Cost of medicine | An asthma patient added: ‘You have rent to pay, you have your debts, your car; you have to dress your kids, feed them, feed yourself. So when your medication comes into your paying line, probably it annoys you to go and get it.’ (Allied health professionals) | Unequivocal |
| Cost of medicine | ‘We prescribe expensive medications, and sometimes, we forget that there are patients who do not have partial or total medication insurance coverage.’ (Physician) | Unequivocal |
| Self-stigma | ‘We do not want others to know we are asthmatics and we have to take the inhalers.’ (Patient) | Unequivocal |
| Self-stigma | ‘Often, these patients do not see themselves as being ill, especially if you treat a 40-year-old who has always been healthy and has to accept that his health is no longer perfect.’ (Physician) | Unequivocal |
| Patients perceived  responsibility  for adherence | ‘For me, there are different levels of responsibility. That of the diagnosis and prescription, ok, it’s the physician’s. But once I have the prescription in my pocket or at the drug store, it’s my own responsibility. The adherence… that belongs to me!’ (Patient) | Unequivocal |
| Physicians’ responsibility for Follow up | ‘Being sure the medication is appropriate, even in relation to other diseases, and asking patients how they are and checking whether they’re using the medication correctly.’ (Physician) | Unequivocal |

7. George, M., Keddem, S., Barg, F. K., Green, S., & Glanz, K. (2015). Urban adults' perceptions of factors influencing asthma control. Journal of Asthma, 52(1), 98-104. <https://www.tandfonline.com/doi/full/10.3109/02770903.2014.947651>

| **Findings** | **Illustration from study** | **Evidence** |
| --- | --- | --- |
| Living environment | ‘I need a cat because we have mice. I came home from the hospital there was a cat here. So if we didn’t have to have a cat that would be a lot better as well. He’s starting to grow on me.’ (Patient) | Unequivocal |
| Beliefs about medicine | ‘It’s the one thing I try to do, I take my (brand name ICS), because that’s maintenance, and it keeps me really open.’(Patient) | Unequivocal |
| Patients’ relationship with physicians | ‘One of the things is to be upfront with your doctor. And if you feel that your doctor is not giving you the right treatment or he’s not listening to you, change doctors.’(Patient) | Unequivocal |
| Personal behavior | ‘Sometimes I wasn’t taking the inhaler (ICS), because like I’m fine now…I don’t take it when I’m fine. I don’t take it every day like I’m supposed to...Like now, I don’t have a cold. I’m fine. So I didn’t take it.’’ (Patient) | Unequivocal |

8. Peláez, S., Bacon, S. L., Lacoste, G., & Lavoie, K. L. (2016). How can adherence to asthma medication be enhanced? Triangulation of key asthma stakeholders' perspectives. Journal of Asthma, 53(10), 1076-1084. <https://www.tandfonline.com/doi/full/10.3109/02770903.2016.1165696>

| **Findings** | **Illustration from study** | **Evidence** |
| --- | --- | --- |
| Sufficient knowledge and understanding of disease needed | ‘When the physician tells you take the medication, unless you know what may happen to you, you don’t really pay attention. You start considering seriously…when you accept that you will have to take it for the rest of your life…’ (Patient) | Unequivocal |
| Sufficient knowledge and understanding of disease needed | ‘The truth is that medication intake is related to the symptoms the patients have… the way the patients conceive the disease, i.e., what they know, what they believe…so they take the medication if they’re having symptoms and they stop when the symptoms are gone…’ (Physician) | Unequivocal |
| Patient’s benefit of taking medication | ‘Of course there are some associated effects to asthma medication, but I decided to take it because I know it’s good for me’. (Patient) | Unequivocal |
| Physician’s responsibility for follow up | ‘Some need a closer follow-up, a weekly phone call. If they get to adhere at that point, then it’s done because they notice the benefits of medication adherence, but if we offer a 3-to-4 month follow-up, we lose them. So, we should target this....’ (Physician) | Unequivocal |
| Education plays a role in medication  adherence | ‘I would say that the intervention has to have an impact on the  patient… it has to improve the patient’s health… it has to have an overall positive impact that the patient can notice. The patient will be pleased with such an intervention…’ (Allied healthcare professional) | Unequivocal |

9. Hedenrud, T., Jakobsson, A., El Malla, H., & Håkonsen, H. (2019). “I did not know it was so important to take it the whole time”− self-reported barriers to medical treatment among individuals with asthma. BMC Pulmonary Medicine, 19(1), 1-10. <https://link.springer.com/article/10.1186/s12890-019-0934-3>

| **Findings** | **Illustration from study** | **Evidence** |
| --- | --- | --- |
| Health care accessibility | ‘So then you get stuck in a queue, maybe wait one to two weeks, or that all doctors should come home from their holidays, to get to one’s doctor, to get the prescription…’. (Patient) | Unequivocal |
| Personal behavior | ‘I do not like so much taking them, so I avoid them sometimes, because I... It does not feel like you should take such substances. So then I've stopped taking them sometimes if I feel fine’. (Patient) | Unequivocal |
| Concerning of cost | ‘I can, of course, go to the emergency ward, but it is more expensive and it is difficult for pensioners’. (patient) | Unequivocal |
| Lack of knowledge | ‘I thought that this was something you would have only half a year, then it was gone. So, I avoided the medicines for a year maybe. I did not know it was so important to take it the whole time’. (Patient) | Unequivocal |
| Negative experience of diagnosis process | ‘… I have been contacting a doctor a number of times because it is an incredible amount of cough and phlegm. But it has not been taken seriously…’. (Patient) | Unequivocal |
| Practical obstacles to using medicines | ‘Going away for a few months, you have to fill half the  bag with only medicine’. (Patient) | Unequivocal |
| Belief about medicine | ‘…it does not really help with the medicine I have, even though we have changed and tried different ones.’ (Patient) | Unequivocal |

10. Norful, A. A., Bilazarian, A., Chung, A., & George, M. (2020). Real-world drivers behind communication, medication adherence, and shared decision making in minority adults with asthma. Journal of Primary Care & Community Health, 11, 2150132720967806. <https://journals.sagepub.com/doi/full/10.1177/2150132720967806>

| **Findings** | **Illustration from study** | **Evidence** |
| --- | --- | --- |
| Lack of knowledge | ‘I didn’t know that it is prescribed for twice a day. I just use it when I am short of breath. Other times I go through an inhaler a day.’(Patient) | Unequivocal |
| Individualized care plan and targeted goals needed | A verbalized agreement with the plan of care and targeted goals individualized to fit the patient’s educational and psychosocial needs. (Interpreted by the researchers) | Credible |
| Misperception of medicine/ concern about tolerance | “the more you take something you get immune to it. That’s why they kept upping my asthma medication.” (Patient) | Unequivocal |

11. Ardura-Garcia, C., Blakey, J. D., Cooper, P. J., & Romero-Sandoval, N. (2021). Caregivers’ and healthcare professionals’ perspective of barriers and facilitators to health service access for asthmatic children: a qualitative study. BMJ open respiratory research, 8(1), e001066. <https://bmjopenrespres.bmj.com/content/8/1/e001066.abstract>

| **Findings** | **Illustration from study** | **Evidence** |
| --- | --- | --- |
| Lack of health care availability made to a poor follow-up | ‘There aren’t even enough human resources. It has happened to me sometimes that just one doctor oversees all the emergency area.’ (HCP) | Unequivocal |
| Lack of health care availability made a barrier to medicine adherence | ‘To get an appointment sometimes you get an answer, sometimes you don’t, and it is a chaos. One goes there, but they tell you: ‘Wait for your turn’. Then you stop giving him the medication.’ (Family caregiver) | Unequivocal |
| Education intervention needed | ‘Education programs and health programs that teach what asthma is and that can remove all the taboos that we have about asthma.’ (HCP) | Unequivocal |
| Concern of side effects | ‘Because our body is not going to be under medication all the time; this medication has effects on certain parts of our organism and our defences. […] a lot of medication, […] makes them become stupid.’ (Family caregiver) | Unequivocal |
| Healthcare professional lack compassion | ‘Once I got there with – with my child with an attack and a nurse put a thermometer, I was there with the child, and she sat down, I swear that she took a nail polish, and she started to paint her nails.’ (Family caregiver) | Unequivocal |

12. Wadhahi, A. A., Garvey, L., Edward, K. L., & Beasley, C. (2022). The lived experience of adherence to asthma medication in young adults (18–34 years). Journal of Asthma, 1-16.

<https://www.tandfonline.com/doi/full/10.1080/02770903.2021.2018706>

| **Findings** | **Illustration from study** | **Evidence** |
| --- | --- | --- |
| Perception/health belief of medicine adherence | ‘It [Seretide] definitely does prevent it [asthma] and you know like if I’m feeling little bit tightly and I take it [Ventolin], just treats it [asthma] for sure.’ (Patient) | Credible |
| Lack of consistency in treatment between physicians effected patients’ adherence | “My doctor [in Australia] asked me to use this inhaler  [Seretide], even if I’m having it [symptoms] or not, [I  should] continuously use it [Seretide]” (Patient) | Unequivocal |
| Personal behavior | “I take it [Seretide] twice [daily]. Before breakfast and  before bed”. (Patient) | Unequivocal |

**Appendix 4. Results of meta-synthesis**

| **Findings** | **Categories** | **Synthesised findings** |
| --- | --- | --- |
| Positive relationship with doctor | Relationship with Healthcare Professionals | **Synthesised finding 1:** **The role of** r**elationship and communication with/ between Healthcare Professionals in medicine adherence**  Both patients and healthcare professionals believe that good relationship and communication between patients and physicians take an important role in disease management and medication adherence |
| Negative relationship with doctor |
| Patients’ relationship with physicians |
| Negative diagnosis process |
| Healthcare professional lack compassion |
| Negative experience of diagnosis process |
| Unclear communication | Communication issue with /between Healthcare Professionals |
| Communication issue |
| Lack of consistency in treatment and management between physicians |
| Lack of consistency in treatment between physicians effected patients’ adherence |
| Follow up support needed |
| Physician’s responsibility for Follow up |
| Physicians’ responsibility for Follow up |
| Lack of health care availability made to a poor follow-up |
| Barriers to medication adherence/Patients are busy | Health care accessibility |
| Health care accessibility |
| Barriers to medication adherence/waiting |
| Lack of health care availability made a barrier to medicine adherence |
| Cost of medicine |
| Cost of medicine |
| Concerning of cost |
| Concerned about cost and  adverse effects |
| Lack of information about the disease | Patients lack information and knowledge | **Synthesised finding 2:** **Insufficient information from Healthcare Professionals acting as barrier** **for adherence**  Patients who lack knowledge and information about their diseases and medicines a are less likely to adherence |
| Lack of information |
| Lack of knowledge |
| Lack of knowledge |
| Sufficient knowledge and understanding of disease needed |
| Sufficient knowledge and understanding of disease needed |
| Education intervention needed | Education needed for patients |
| Individualized care plan and targeted goals needed |
| Education needed for patients |
| Physicians do not have the time to educate patients/ physicians were not providing enough information. |
| Education plays a role in medication  adherence |
| Self-stigma | Attitude toward disease | **Synthesised finding 3:** **How patient’s attitude/beliefs effect their adherence to medication**  Patient’s recognition and attitude toward the disease and knowledge of the severity and consequence of disease effect their diseases management and their medicines adherence. Patients’ perception/ belief/ or trust of the medicine also effect their medicines adherence. |
| Self-stigma / lost identity |
| Lost identity |
| Lose identity |
| Denial diagnosis |
| Mistrust of medication | Beliefs/knowledge about medicine |
| Beliefs about medicine |
| Perception/health belief of medicine adherence |
| Belief about medicine |
| Patient’s benefit of taking medication |
| Belief about medicine |
| Fear of side effects |
| Concern of side effects |
| Positive attitude toward medicine |
| Concern about tolerance from medicine | Concern about tolerance from medicine |
| Concern about tolerance from medicine |
| Misperception of medicine/ concern about tolerance |
| Living environment | External factor influencing asthma control | **Synthesised finding 4:** **Patients’ personal behavior and other external barriers**  Patients’ personal behavior effect their medicine adherence. Other factors such as the cost of treatment and medication are also barrier to medicine adherence when there is a paid for healthcare system |
| Busy life |
| Practical obstacles to using medicines |
| Patients’ responsibility | Patients’ personal behavior |
| Patient perceived responsibility  for adherence |
| Personal behavior |
| Personal behavior |
| Personal behavior |

**Appendix 5. ConQual summary of findings**

| **Systematic review title:** Medication adherence with asthma: a qualitative systematic review of patients and health professionals’ perspectives  **Population:** Patients with asthma and health professionals  **Phenomena of interest:** Asthma patients’ experience of medication adherence, health professionals’ perspectives of asthma patients’ medication adherence  **Context:** qualitative research in all healthcare settings | | | | |
| --- | --- | --- | --- | --- |
| Synthesized findings | Type of research | Dependability | Credibility | ConQual Score |
| **Synthesised finding 1: the role of relationship and communication with/ between Healthcare Professionals in medication adherence:**  Both patients and healthcare professionals believe that good relationship and communication between patients and physicians take an important role in disease management and medication adherence | Qualitative | High | Downgrade  1 level** | Moderate |
| **Synthesised finding 2: Insufficient information from Healthcare Professionals acting as barrier for adherence:**  Patients who lack knowledge and information about their diseases and medication a are less likely to adherence | Qualitative | High | High | Moderate |
| **Synthesised finding 3: how patient’s attitude/beliefs effect their adherence to medication:**  Patient’s recognition and attitude toward the disease and knowledge of the severity and consequence of disease effect their diseases management and their medicines adherence. Patients’ perception/ belief/ or trust of the medicine also effect their medicines adherence. | Qualitative | High | High | Moderate |
| **Synthesised finding 4:** **Patients’ personal behavior and other external barriers:**  Patients’ personal behavior effect their medicine adherence. Other factors such as the cost of treatment and medication are also barrier to medicine adherence when there is a paid for healthcare system | Qualitative | High | High | Moderate |

**The credibility downgrade one level due to a mix of unequivocal and credible findings
